# Supplementary material for: The preparation of liquefied bio-stalk carbon nanofibers and their application in supercapacitors
Source: Royal Society of Chemistry journal article supplement (doi:10.1039/c9ra03361k), 2019-01-01
Supplement: c9ra03361k1.pdf [file c9ra03361k1.pdf]

Supporting Information for  
**Preparation of liquefied bio-stalk carbon Nanofibers and their  
application in supercapacitors**

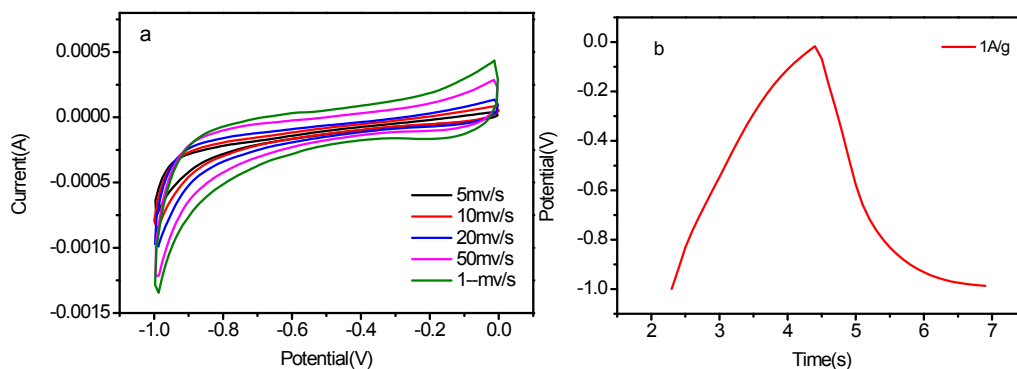

Fig. S1 Electrochemical performance of the blank Ni-foam measured in a three-electrode system. (a) CV curves for the blank Ni-foam at scan rates ranging from 5 to 100  $\text{mVs}^{-1}$ ; (b) galvanostatic charge-discharge curves of all the blank Ni-foam at the current density of  $1 \text{ A g}^{-1}$ .
